# Supplementary material for: Multitask Convolutional Neural Network for Rolling Element Bearing Fault Identification
Source: Hindawi journal article supplement (doi:10.1155/2020/1971945), 2020-07-14
Supplement: f1 [file 1971945.f1.zip]

Archive with 18 entries (14 files):
- self-collected data/ball/
- self-collected data/ball/ball1300.mat
- self-collected data/ball/ball1350.mat
- self-collected data/ball/ball1400.mat
- self-collected data/ball/ball1450.mat
- self-collected data/inner/
- self-collected data/inner/in1300.mat
- self-collected data/inner/in1350.mat
- self-collected data/inner/in1400.mat
- self-collected data/inner/in1450.mat
- self-collected data/normal/
- self-collected data/normal/normal1400.mat
- self-collected data/normal/normal1450.mat
- self-collected data/outer/
- self-collected data/outer/out1300.mat
- self-collected data/outer/out1350.mat
- self-collected data/outer/out1400.mat
- self-collected data/outer/out1450.mat
